# Supplementary material for: Intended and Unintended Consequences of Atmospheric Methane Oxidation Enhancement
Source: Copernicus journal article supplement (doi:10.5194/egusphere-2024-3139), 2024-12-05
Supplement: Supplementary file 1 [file egusphere-2024-3139-supplement.pdf]

**Supplemental Information for:**

**Intended and Unintended Consequences of Atmospheric Methane Oxidation Enhancement**

Hannah M. Horowitz<sup>1</sup>

<sup>1</sup> Department of Civil and Environmental Engineering and Department of Climate, Meteorology, & Atmospheric Sciences,  
5 University of Illinois Urbana-Champaign, Urbana, Illinois, USA

Correspondence to: Hannah M. Horowitz ([hnhorow@illinois.edu](mailto:hnhorow@illinois.edu))

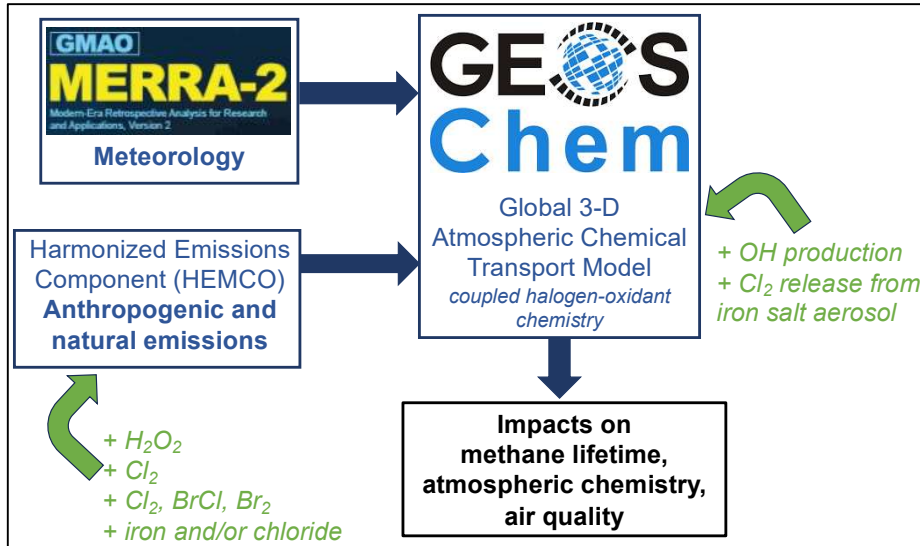

**Figure S1.** Methodology Schematic.

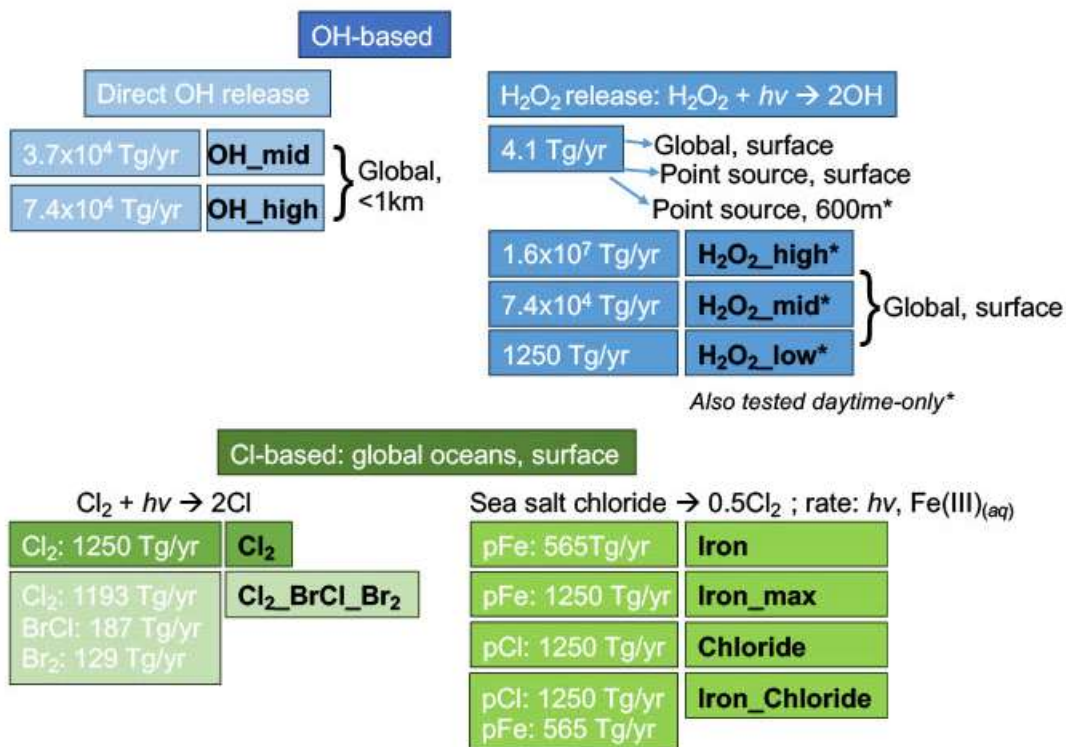

**Figure S2.** All model experiments conducted in the current study, grouped by methane oxidation mechanism and emitted species.

**Table S1** Scenarios with Negligible Results

|                                           | Emitted Species               | Total Emissions<br>(Tg/yr) | Emissions<br>Location                               | Emissions<br>at Location of<br>Emissions<br>(kg/m <sup>2</sup> /s) | Rate                                                                               |
|-------------------------------------------|-------------------------------|----------------------------|-----------------------------------------------------|--------------------------------------------------------------------|------------------------------------------------------------------------------------|
| H <sub>2</sub> O <sub>2</sub> _production | H <sub>2</sub> O <sub>2</sub> | 4.1                        | Globally<br>surface                                 | at                                                                 | 2.549E-13                                                                          |
| H <sub>2</sub> O <sub>2</sub> _point      | H <sub>2</sub> O <sub>2</sub> | 4.1                        | Major<br>gas<br>sources                             | natural<br>point                                                   | 1.126E-10                                                                          |
| H <sub>2</sub> O <sub>2</sub> _point_600m | H <sub>2</sub> O <sub>2</sub> | 4.1                        | Major<br>gas<br>sources,<br>at<br>600<br>m altitude | natural<br>point                                                   | 1.126E-10; also<br>tested with 2x<br>emissions during<br>daytime only<br>(6am–6pm) |

**Table S2** Direct OH Release Scenarios

|         | Emitted Species | Production<br>Rate (Tg/yr) | Emissions<br>Location  | Reaction,<br>Coefficient   | Rate |
|---------|-----------------|----------------------------|------------------------|----------------------------|------|
| OH_mid  | OH              | 3.7E4                      | Globally up<br>to 1 km | [O <sub>2</sub> ]*1.78E-12 |      |
| OH_high | OH              | 7.4E4                      | Globally up<br>to 1 km | [O <sub>2</sub> ]*3.56E-12 |      |

20

**Table S3** Comparison of Q. Li et al. (2023) and the Current Study Relevant to the Cl<sub>2</sub> and Cl<sub>2</sub>\_BrCl\_Br<sub>2</sub> Scenarios

|                         | Q. Li et al. (2023)                                                                                                                                                                                                                                                                                   | This Study                                                                                                                                                                                                                                                                                                                    |
|-------------------------|-------------------------------------------------------------------------------------------------------------------------------------------------------------------------------------------------------------------------------------------------------------------------------------------------------|-------------------------------------------------------------------------------------------------------------------------------------------------------------------------------------------------------------------------------------------------------------------------------------------------------------------------------|
| Model                   | CAM4-Chem-CESM-1.1                                                                                                                                                                                                                                                                                    | GEOS-Chem 13.2.1                                                                                                                                                                                                                                                                                                              |
| Model run time          | 2020–2050                                                                                                                                                                                                                                                                                             | 2019                                                                                                                                                                                                                                                                                                                          |
| Anthropogenic emissions | Representative concentration pathway 8.5 time-varying                                                                                                                                                                                                                                                 | CEDS CMIP6, year 2019                                                                                                                                                                                                                                                                                                         |
| Halogen chemistry       | Li et al. (2022); includes Saiz-Lopez et al. (2014) and Ordóñez et al. (2012) plus chlorine and bromine release from sea salt+N <sub>2</sub> O <sub>5</sub> (also in GEOS-Chem), sea salt+HNO <sub>3</sub> (not in GEOS-Chem), and N <sub>2</sub> O <sub>5</sub> +HCl based on Hossaini et al. (2016) | Wang et al. (2021); includes Wang et al. (2019), Sherwen, Evans, et al. (2016), Sherwen, Schmidt, et al. (2016), and Zhu et al. (2019), plus sulfate formation from HOBr and HOCl, N <sub>2</sub> O <sub>5</sub> +Cl <sup>-</sup> from Wang et al. (2020), improved reactive uptake coefficients on ice crystals for halogens |
| Model resolution        | 1.9° × 2.5° horizontal                                                                                                                                                                                                                                                                                | 4° × 5° horizontal                                                                                                                                                                                                                                                                                                            |
| Model resolution        | 26 vertical levels up to 40 km                                                                                                                                                                                                                                                                        | 72 vertical layers up to 80 km; chemistry performed in first 59 layers up to 49.8 km                                                                                                                                                                                                                                          |

**Table S4** Comparison of van Herpen et al. (2023) and Current Study for Iron and Chloride Scenarios

|                                         | van Herpen et al. (2023)                                                                     | This Study                                                                                |
|-----------------------------------------|----------------------------------------------------------------------------------------------|-------------------------------------------------------------------------------------------|
| Model                                   | CAM4-Chem                                                                                    | GEOS-Chem 13.2.1                                                                          |
| Model run time                          | June 1996–1998                                                                               | 2019                                                                                      |
| Aerosols participating                  | Dust 1–2.5 $\mu\text{m}$                                                                     | Dust 0.1–1 $\mu\text{m}$ ; Accumulation mode sea salt chloride ( $\leq 0.5 \mu\text{m}$ ) |
| Dust iron content                       | 3.5%                                                                                         | 3.5%                                                                                      |
| Photoactive iron                        | Dust: 1.8%                                                                                   | Dust: 2.68%<br>Anthropogenic: 26.8%                                                       |
| Reaction rate for $\text{Cl}_2$ release | Fe(II)–Fe(III) cycling kinetics from Zhu et al. (1993) (calculations based on field samples) | Based on Wittmer, Bleicher, and Zetzsch (2015) chamber study (Chen et al., 2024)          |
| Halogen chemistry                       | Wang et al. (2021)                                                                           | Wang et al. (2021)                                                                        |
| Horizontal model resolution             | $0.9^\circ \times 1.25^\circ$                                                                | $4^\circ \times 5^\circ$                                                                  |
| Vertical model resolution               | 56 vertical levels up to 40 km                                                               | 72 vertical levels up to 80 km; chemistry performed in first 59 layers up to 49.8 km      |

**Table S5** Changes in Tropospheric Burdens for the OH Experiments

|          | $\text{Br}_y$ | $\text{Cl}_y$ | $\text{I}_y$ | $\text{O}_3$ | OH     | Cl     | $\text{NO}_x$ | CO     |
|----------|---------------|---------------|--------------|--------------|--------|--------|---------------|--------|
| Standard | 20 Gg         | 241 Gg        | 12 Gg        | 338 Tg       | 215 Mg | 318 kg | 359 Gg        | 349 Tg |
| OH_mid   | 41.2          | 11.6          | -17.8        | -10.4        | 50.8   | 45.2   | -21.1         | -26.4  |
| OH_high  | 54.6          | 19.5          | -28.3        | -14.3        | 94     | 72.3   | -24.7         | -31.1  |

**TABLE S6** Percent Change in Tropospheric Burdens of Other Climate Forcers and Ozone-Depleting Substances, with Cl Atom Included for Reference, for Experiments Described in Table 1

|               | HCFC-123 | Total inorganic aerosol | Dibromo-methane (CH <sub>2</sub> Br <sub>2</sub> ) | Bromoform (CHBr <sub>3</sub> ) | Methyl iodide (CH <sub>3</sub> I) | Cl     | ozone<br>35         |
|---------------|----------|-------------------------|----------------------------------------------------|--------------------------------|-----------------------------------|--------|---------------------|
| H2O2_high     | -74.2    | 11.0                    | -61.0                                              | -39.3                          | -6.6                              | 396.4  | -38.5               |
| H2O2_mid      | -34.7    | 13.7                    | -30.7                                              | -20.9                          | -3.0                              | 75.2   | -6.3                |
| H2O2_low      | -3.8     | 7.3                     | -3.8                                               | -2.6                           | -0.4                              | 6.5    | -0.8                |
| Cl2           | 30.7     | 6.8                     | 36.9                                               | 10.8                           | -1.1                              | 2185.2 | -24.4               |
| Cl2_BrCl_Br2  | 64.0     | 20.9                    | 76.2                                               | 12.1                           | -7.9                              | 1839.8 | -67.7 <sup>40</sup> |
| Iron          | 2.7      | 10.0                    | 2.8                                                | 1.0                            | -0.2                              | 179.3  | -3.5                |
| Chloride      | 5.3      | -0.5                    | 5.6                                                | 2.3                            | -0.2                              | 180.9  | -5.5                |
| Iron_Chloride | 11.0     | 10.9                    | 11.8                                               | 4.4                            | -0.5                              | 680.8  | -10.7               |

45

**TABLE S7** Percent Change in Stratospheric Burdens (tropopause up to 50 km) of Other Climate Forcers and Ozone-Depleting Substances, with Cl Atom Included for Reference, for Experiments Described in Table 1

|               | HCFC-123 | Total inorganic aerosol | Dibromo-methane (CH <sub>2</sub> Br <sub>2</sub> ) | Bromoform (CHBr <sub>3</sub> ) | Methyl iodide (CH <sub>3</sub> I) | Cl   | ozone<br>50        |
|---------------|----------|-------------------------|----------------------------------------------------|--------------------------------|-----------------------------------|------|--------------------|
| H2O2_high     | -0.7     | -2.0                    | -61.0                                              | -60.6                          | -11.0                             | 0.3  | -0.3               |
| H2O2_mid      | -0.3     | -1.3                    | -27.0                                              | -23.4                          | -3.9                              | 0.0  | -0.1               |
| H2O2_low      | 0.0      | -0.2                    | -3.1                                               | -2.5                           | -0.5                              | 0.0  | 0.0                |
| Cl2           | 0.3      | 3.4                     | 36.9                                               | 16.0                           | -2.4                              | -3.1 | -0.5               |
| Cl2_BrCl_Br2  | 0.5      | 9.2                     | 76.2                                               | 11.7                           | -15.6                             | -1.5 | -7.8 <sup>55</sup> |
| Iron          | 0.0      | 0.4                     | 2.5                                                | 1.1                            | -0.4                              | 0.0  | 0.0                |
| Chloride      | 0.0      | 0.2                     | 5.0                                                | 2.4                            | -0.5                              | -2.3 | -0.3               |
| Iron_Chloride | 0.1      | 1.0                     | 10.9                                               | 4.9                            | -1.1                              | -2.2 | -0.5               |

**TABLE S8** Changes in Tropospheric Species in Reference to Impacts from Future Hydrogen Economy

|                                                                         | OH | Methane | CO | Ozone | NO  | Sulfate                                                                |
|-------------------------------------------------------------------------|----|---------|----|-------|-----|------------------------------------------------------------------------|
| Hydrogen <sup>a</sup>                                                   | ↓  | ↑       | ↑  | ↑     | N/A | N/A; shift from new particle formation to particle growth <sup>b</sup> |
| H <sub>2</sub> O <sub>2</sub> -based oxidation enhancement <sup>c</sup> | ↑  | ↓       | ↓  | ↓     | ↓   | ↑                                                                      |
| Chlorine-based oxidation enhancement <sup>c</sup>                       | ↓  | ↓       | ↑  | ↓     | ↓   | ↑                                                                      |

60 NOTE: “Hydrogen” here does not include reductions in fossil fuel emissions replaced by hydrogen technology.

<sup>a</sup> Warwick et al., 2023.

<sup>b</sup> O’Connor et al., 2022.

<sup>c</sup> This work.

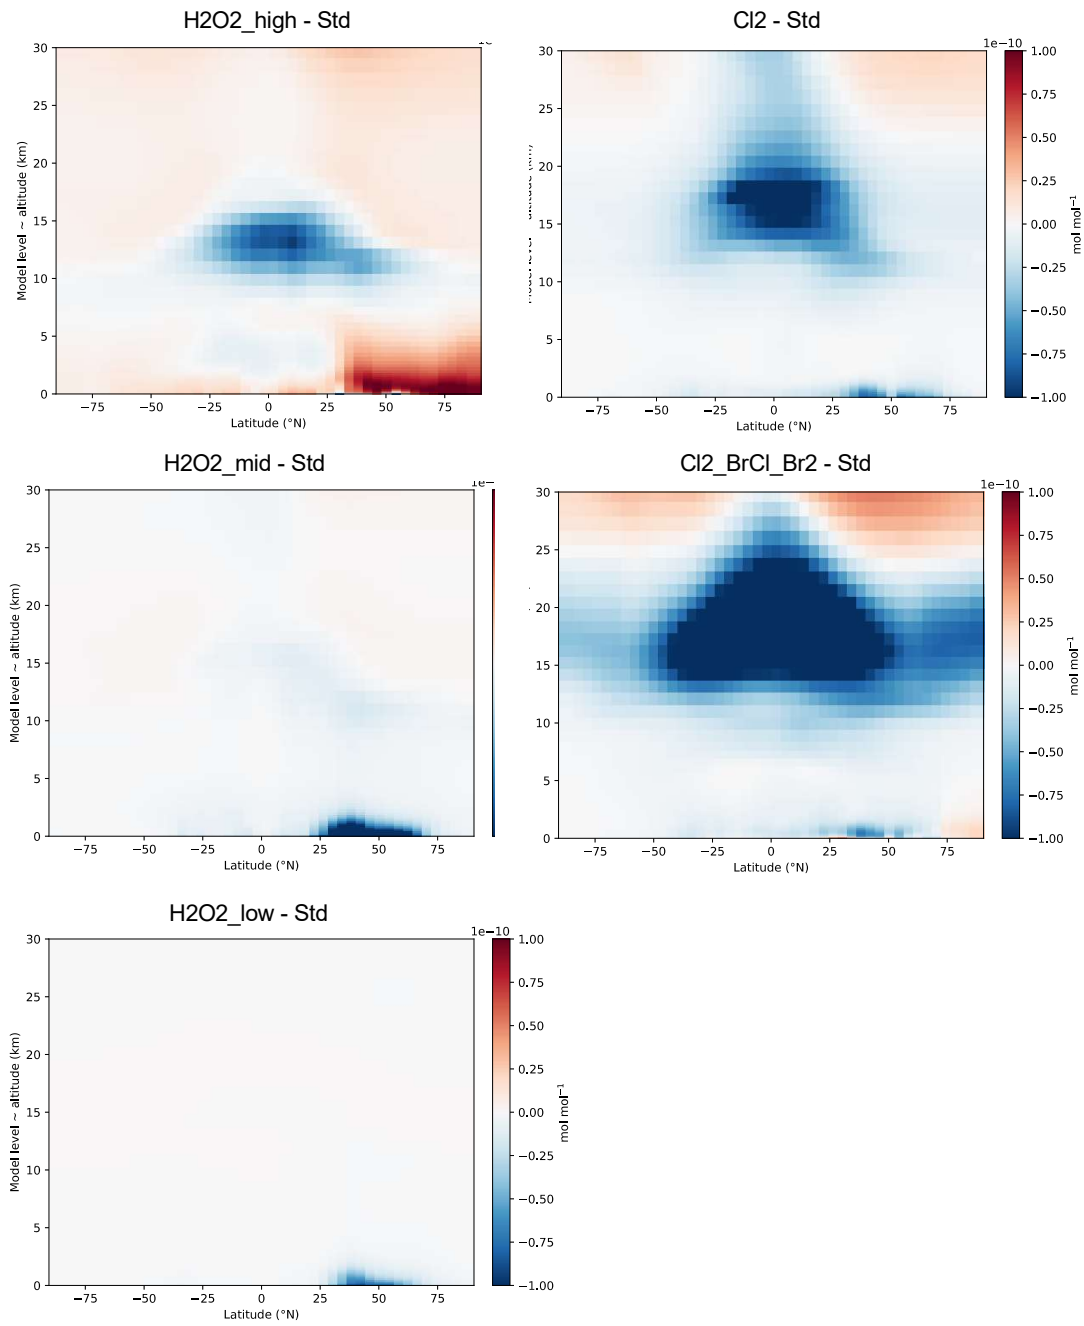

65

**Figure S3** Zonal mean absolute changes in  $\text{NO}_x$  across the scenarios in mol/mol.



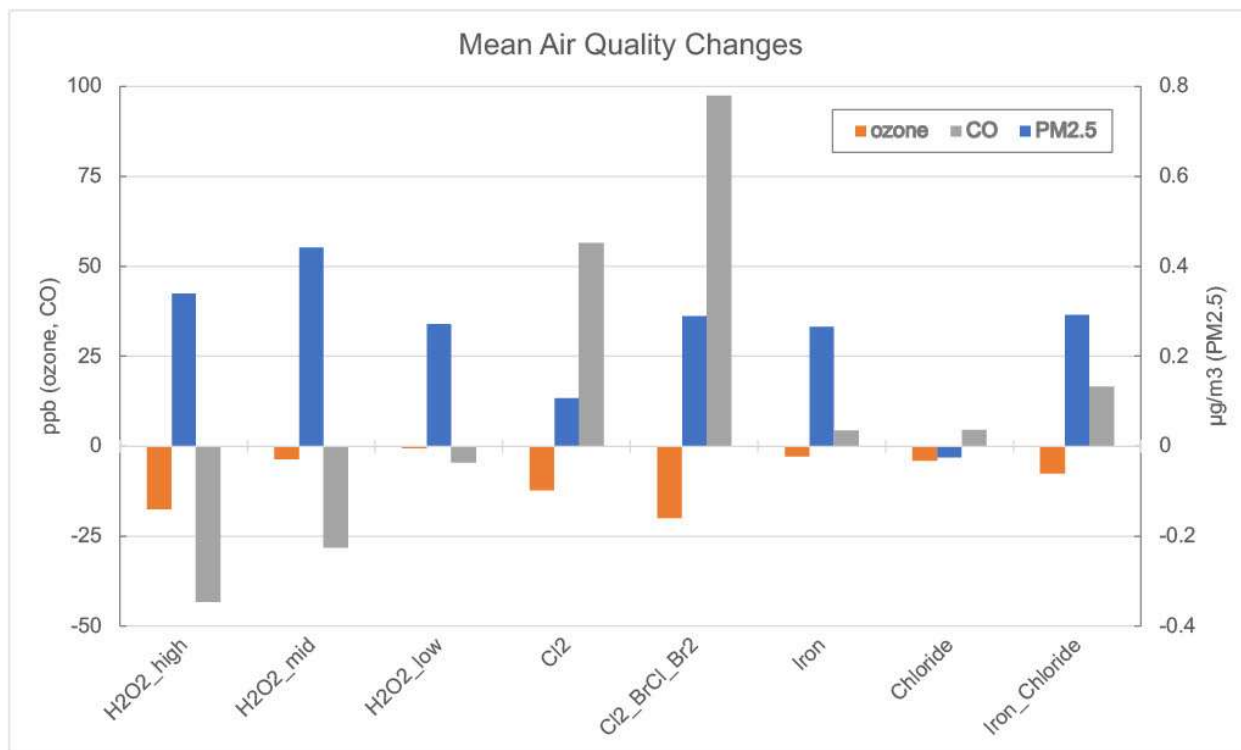

**Figure S4** Changes in global annual mean ozone (orange), CO (gray) (left axis), and PM<sub>2.5</sub> (blue, right axis) concentrations across the experiments.
